# Supplementary material
Source: PubMed Central journal article supplement (PMC3486225)
Supplement: JCM.00942-12_zjm999092057so1.pdf [file JCM.00942-12_zjm999092057so1.pdf]

Diagnostic accuracy of PCR alone and compared to galactomannan in bronchoalveolar lavage for the diagnosis of invasive aspergillosis: Systematic review

Supplemental material:

**Supplementary Table 1:** QUADAS-2 tool adapted for our review

|                                                       |                                                                                                                                                                                                                                                             |
|-------------------------------------------------------|-------------------------------------------------------------------------------------------------------------------------------------------------------------------------------------------------------------------------------------------------------------|
| Patient selection – Risk of bias                      | <p>1. Was a consecutive or random sample of patients enrolled?</p> <p>2. Was a case-control design avoided?</p> <p>3. Did the study avoid inappropriate exclusions?</p> <p>If case control = high risk, if all yes = low risk.</p> <p>Otherwise unclear</p> |
| Patient selection – Concerns regarding applicability  | <p>Is there concern that the included patients do not match the review question?</p> <p>Considered high = not strictly adherent with EORTC/MSG host criteria, low = host + clinical factor by EORTC/MSG. Otherwise unclear.</p>                             |
| Index test – Risk of bias                             | <p>Were the index test results interpreted without knowledge of the results of the reference standard?</p> <p>If no = high risk, if yes = low risk. Otherwise unclear</p>                                                                                   |
| Reference standard – Risk of bias                     | <p>Were the reference standard results interpreted without knowledge of the results of the index test?</p> <p>If no = high risk, if yes = low risk. Otherwise unclear</p>                                                                                   |
| Reference standard – Concerns regarding applicability | <p>Is there concern that the target condition as defined by the reference standard does not match the review question?</p> <p>Considered high = reference standard not strictly</p>                                                                         |

|                                |                                                                                                                                                                                                                                                                                                                                                                                                                                           |
|--------------------------------|-------------------------------------------------------------------------------------------------------------------------------------------------------------------------------------------------------------------------------------------------------------------------------------------------------------------------------------------------------------------------------------------------------------------------------------------|
|                                | <p>adherent with EORTC criteria 2002 or 2008, low = reference standard EORTC criteria 2002 or 2008 or these could be reapplied using individual patient description.</p> <p>Otherwise unclear.</p>                                                                                                                                                                                                                                        |
| Flow and timing - Risk of bias | <p>1. Was there an appropriate interval between index test(s) and reference standard?</p> <p>2. Did all patients receive a reference standard?</p> <p>3. Did patients receive the same reference standard?</p> <p>4. Were all patients included in the analysis?</p> <p>If any no = high risk, if all yes = low risk. Otherwise unclear</p> <p>Q1 considered appropriate interval if BAL performed within 2 weeks of infection onset.</p> |

The following signaling questions were considered irrelevant for our review:

| <b>Domain</b>                                 | <b>Signalling question</b>                                                           | <b>Reason for exclusion</b>                                                                                                                            |
|-----------------------------------------------|--------------------------------------------------------------------------------------|--------------------------------------------------------------------------------------------------------------------------------------------------------|
| Index test – Risk of bias                     | If a threshold was used, was it pre-specified?                                       | Results of PCR are read as positive or negative. Real-time PCR might have a threshold of copies, however again, result is read as positive or negative |
| Index test – Concerns regarding applicability | Is there concern that the index test, its conduct, or interpretation differ from the | Per inclusion criteria only PCR tests were included and all PCR tests were                                                                             |

|                                      |                                                                              |                                                                                                        |
|--------------------------------------|------------------------------------------------------------------------------|--------------------------------------------------------------------------------------------------------|
|                                      | review question?                                                             | considered in our review                                                                               |
| Reference standard –<br>Risk of bias | Is the reference standard likely to correctly classify the target condition? | EORTC/ MSG clinical criteria considered as adequate reference standard, even though it has limitations |
| Flow and timing -<br>Risk of bias    |                                                                              | The answer in all studies was yes, therefore this question was excluded                                |

**Supplementary Table 2: Excluded trials and reason for exclusion**

5 - No reference standard or EORTC/MSG definitions inappropriately applied and data in publication did not permit re-application of consensus definitions

2 - Used previously known Aspergillus-positive samples

4 - No BAL performed or no cases of IA

5 - Population assessed not at risk for IA or data for patients at risk could not be separated from patients not at risk

2 - Bronchoscopy used for screening

2 - Case series / case reports

1 - Non-relevant

16 - Incomplete data reported to construct 2X2 tables for sensitivity and specificity

3 - Inclusion of same patients as Buchheidt 2001 included in the review and Reinwald 2012. The publications with more patients or full subgroup analyses were selected for inclusion.

**Supplementary Table 3: Study characteristics**

| Study ID              | City,<br>Country     | Year<br>start | Year<br>end | Study design                 | N<br>patients | N (%)<br>Haematological<br>malignancy/ N<br>(%) HSCT | Study population                                                                                                                                                                                                                         | Criteria used for IPA<br>definition (adherence<br>to the reference<br>standard Y / N) | N patients<br>with proven /<br>probable |
|-----------------------|----------------------|---------------|-------------|------------------------------|---------------|------------------------------------------------------|------------------------------------------------------------------------------------------------------------------------------------------------------------------------------------------------------------------------------------------|---------------------------------------------------------------------------------------|-----------------------------------------|
| Bretagne<br>1995(6)   | Cre`teil,<br>France  | 1992          | 1993        | Cohort,<br>prospective       | 28            | 11 (39.3%) / 9<br>(32.1%)                            | Immunocompromised patients with<br>respiratory signs and unexplained fever                                                                                                                                                               | NIAID-MSG 1989<br>(N)                                                                 | 3 (10.7%)                               |
| Buchheidt<br>2001 (7) | Mannheim,<br>Germany | 1995          | 1998        | Cohort,<br>prospective       | 67            | 61 (89.5%) / 4<br>(6.0%)                             | Patients with haematological malignancies,<br>neutropenia , fever unresponsiveness to the<br>first line antibacterial treatment, and/or<br>newly arisen nonspecific pulmonary<br>infiltrates proven by conventional chest<br>radiography | NIAID-MSG 1989<br>(Y)                                                                 | 9 (13.4%)                               |
| Frealle 2009<br>(15)  | Lille,<br>France     | 2000          | 2004        | Cohort,<br>retrospective     | 55            | 55 (100.0%) / 3<br>(5.5%)                            | Haematological cancer patients, HSCT at<br>risk for IA                                                                                                                                                                                   | EORTC\MSG 2002<br>(Y)                                                                 | 23 (41.8%)                              |
| Hadrich<br>2011 (19)  | Sfax,<br>Tunisia     | 2004          | 2007        | Case-Control,<br>prospective | 42            | 42 (100%) / 0<br>(0.0%)                              | Haematological cancer patients with febrile<br>neutropenia and persistent fever for more                                                                                                                                                 | EORTC\MSG 2008<br>modified (N)                                                        | 14 (33.3%)                              |

|                      |                       |      |      |                                |     |                             |                                                                                                  |                                                     |            |
|----------------------|-----------------------|------|------|--------------------------------|-----|-----------------------------|--------------------------------------------------------------------------------------------------|-----------------------------------------------------|------------|
|                      |                       |      |      |                                |     |                             | than 96 h refractory to broad-spectrum antibacterial treatments on whom BALs were performed      |                                                     |            |
| Hayette<br>2001 (20) | Lie`ge,<br>Belgium    | 1997 | 1998 | Cohort,<br>prospective         | 74  | 16 (21.6%) / 0<br>(0.0%)    | Haematological malignancies, HSCT, SOT, high dose steroids. All patients undergoing bronchoscopy | NIAID-MSG 1989<br>modified (N)                      | 10 (13.5%) |
| Jones 1998<br>(21)   | Manchester,<br>UK     | NS   | NS   | Cohort,<br>prospective         | 69  | 69 (100.0%) /<br>NS         | Haematological cancer patients with febrile episodes unresponsive to antibiotics                 | Authors defined.<br>Based on NIAID-<br>MSG 1989 (N) | 5 (7.2%)   |
| Khot 2008<br>(22)    | Seattle,<br>WA, US    | 2002 | 2003 | Cohort,<br>retrospective       | 94  | 94 (100.0%) / 8<br>(61.5%)  | Patients with haematological malignancies or undergoing HSCT with pneumonia or pulmonary nodules | EORTC\MSG 2002<br>(Y)                               | 13 (13.8%) |
| Luong 2011<br>(24)   | Pittsburgh,<br>PA, US | 2000 | 2010 | Cohort,<br>retrospective       | 150 | 0 (0.0%) / 0<br>(0.0%)      | Lung transplant recipients who underwent bronchoscopy for surveillance or diagnostic evaluation  | EORTC\MSG 2008<br>modified (N)                      | 16 (10.6%) |
| Musher<br>2004 (27)  | Seattle,<br>WA, US    | 1993 | 2002 | Case-Control,<br>retrospective | 93  | 93 (100.0%) /<br>44 (88.0%) | Haematological malignancies, bronchoscopy to evaluate pulmonary nodules or infiltrates           | EORTC\MSG 2002<br>modified (N)                      | 46 (49.4%) |

|                                    |                      |      |      |                                |     |                             |                                                                                                                     |                                |            |
|------------------------------------|----------------------|------|------|--------------------------------|-----|-----------------------------|---------------------------------------------------------------------------------------------------------------------|--------------------------------|------------|
|                                    |                      |      |      |                                |     |                             | that were detected after or while being evaluated for HSCT                                                          |                                |            |
| Orsi 2012<br>(28)                  | Modena,<br>Italy     | NS   | NS   | Case-Control,<br>retrospective | 19  | 8 (42.1%) / NS              | Critically ill immunocompromised patients undergoing BAL for evaluation of pulmonary infiltrates                    | EORTC\MSG 2008<br>(Y)          | 6 (31.6%)  |
| Raad 2002<br>(29)                  | Houston,<br>TX, US   | 1996 | 1997 | Cohort,<br>prospective         | 249 | 165 (66.3%) /<br>NS         | Haematological malignancies, other cancer with chest radiographic findings suggestive of pneumonia                  | EORTC\MSG 2002<br>modified (Y) | 32 (12.8%) |
| Rantakokko<br>-Jalava 2003<br>(30) | Turku,<br>Finland    | NS   | NS   | Cohort,<br>prospective         | 66  | NS / NS                     | Haematological malignancies, HSCT, SOT, high dose steroids, bronchiectasis at risk for IA                           | EORTC\MSG 2002<br>(Y)          | 11 (16.6%) |
| Reinwald<br>2012 (31)              | Mannheim,<br>Germany | 2000 | 2011 | Cohort,<br>retrospective       | 226 | 214 (94.7%) /<br>53 (23.5%) | haematological patients at high risk for fungal infections with new lung infiltrates detected by high-resolution CT | EORTC\MSG2002<br>(Y)           | 48 (21.2%) |
| Roselló<br>2011 (32)               | Barcelona,<br>Spain  | NS   | NS   | Cohort,<br>prospective         | 42  | 9 (21.4%) / NS              | Haematological malignancies, SOT immunodeficiency with risk factors for IA                                          | EORTC\MSG 2008<br>(Y)          | 7 (16.6%)  |
| Sanguinetti                        | Rome, Italy          | 2001 | 2002 | Cohort,                        | 44  | 44 (100.0%) /               | Patients with haematological malignancies                                                                           | EORTC\MSG 2002                 | 20 (45.4%) |

|                      |                                 |      |      |                        |     |                            |                                                                                                                                                                                                                                      |                                                     |            |
|----------------------|---------------------------------|------|------|------------------------|-----|----------------------------|--------------------------------------------------------------------------------------------------------------------------------------------------------------------------------------------------------------------------------------|-----------------------------------------------------|------------|
| 2003 (33)            |                                 |      |      | prospective            |     | NS                         | and lung infiltrates                                                                                                                                                                                                                 | (Y)                                                 |            |
| Shahid 2008<br>(34)  | Aligarh,<br>India               | 2004 | 2006 | Cohort,<br>prospective | 69  | 0 (0.0%) / 0<br>(0.0%)     | Patients with lung carcinoma, receiving chemotherapy or chronic steroid therapy                                                                                                                                                      | EORTC\MSG 2002<br>modified (N)                      | 23 (33.3%) |
| Tang 1993<br>(39)    | London,<br>UK                   | NS   | NS   | Cohort,<br>prospective | 23  | 14 (60.9%) / 14<br>(60.9%) | Haematological malignancy, HSCT, SOT and clinical or radiological evidence of respiratory disease                                                                                                                                    | Authors defined.<br>Based on NIAID-<br>MSG 1989 (N) | 5 (21.7%)  |
| Torelli 2011<br>(41) | Rome, Italy                     | 2010 | 2011 | Cohort,<br>prospective | 158 | 52 (42.6%) /<br>NS         | Haematological malignancies, COPD, cirrhosis, cancer receiving chemotherapy, solid organ transplant recipient, HIV, steroid use, or recipient of T-cell immunosuppressant with pneumonia, fever, suspected invasive fungal infection | EORTC\MSG 2008<br>modified (N)                      | 17 (10.7%) |
| Verweij<br>1995 (43) | Nijmegen,<br>The<br>Netherlands | NS   | NS   | Cohort,<br>prospective | 19  | 17 (89.5%) / 5<br>(26.3%)  | Neutropenic patients with fever persisting despite treatment with broad-spectrum antibacterial agents and pulmonary infiltrates                                                                                                      | Authors defined.<br>Based on NIAID-<br>MSG 1989 (Y) | 9 (47.3%)  |



NR – not required, NS – not stated, HSCT – hematologic stem cell transplant, SOT – solid organ transplant, COPD- chronic obstructive pulmonary disease, HIV – human immunodeficiency virus, ICU – intensive care unit, NIAID-MSG – National institute of allergy and infectious diseases – mycoses study group. EORTC\MSG - European Organisation for Research and Treatment of Cancer – Mycoses Study Group.

**Supplementary Table 4: QUADAS-2 risk of bias assessment**

| <b>Study ID</b>    | <b>Patient selection – Risk of bias</b> | <b>Patient selection – Concerns regarding applicability</b> | <b>Index test – Risk of bias</b> | <b>Reference standard – Risk of bias</b> | <b>Reference standard – Concerns regarding applicability</b> | <b>Flow and timing - Risk of bias</b> |
|--------------------|-----------------------------------------|-------------------------------------------------------------|----------------------------------|------------------------------------------|--------------------------------------------------------------|---------------------------------------|
| Bretagne 1995 (6)  | H                                       | L                                                           | L                                | U                                        | U                                                            | U                                     |
| Buchheidt 2001 (7) | L                                       | L                                                           | L                                | L                                        | L                                                            | L                                     |
| Frealle 2009 (15)  | L                                       | L                                                           | L                                | L                                        | L                                                            | L                                     |
| Hadrich 2011 (19)  | H                                       | U                                                           | L                                | U                                        | H                                                            | U                                     |
| Hayette 2001 (20)  | H                                       | L                                                           | H                                | L                                        | H                                                            | U                                     |
| Jones 1998 (21)    | H                                       | U                                                           | L                                | H                                        | U                                                            | U                                     |
| Khot 2008 (22)     | L                                       | U                                                           | L                                | U                                        | L                                                            | U                                     |
| Luong 2011 (24)    | H                                       | L                                                           | L                                | U                                        | H                                                            | U                                     |
| Musher 2004 (27)   | H                                       | L                                                           | L                                | U                                        | H                                                            | H                                     |
| Orsi 2012 (28)     | H                                       | L                                                           | U                                | U                                        | U                                                            | L                                     |
| Raad 2002 (29)     | L                                       | L                                                           | L                                | U                                        | L                                                            | U                                     |

|                             |   |   |   |   |   |   |
|-----------------------------|---|---|---|---|---|---|
| Rantakokko-Jalava 2003 (30) | L | U | H | U | L | U |
| Reinwald 2012 (31)          | L | U | U | L | L | L |
| Roselló 2011 (32)           | L | U | H | U | U | U |
| Sanguinetti 2003 (33)       | L | U | L | L | L | L |
| Shahid 2008 (34)            | H | U | L | L | H | L |
| Tang 1993 (39)              | L | L | L | U | U | U |
| Torelli 2011 (41)           | L | H | L | L | H | L |
| Verweij 1995 (43)           | H | U | L | L | L | U |

H – high risk, U – unclear, L – low risk

**Supplementary Table 5: PCR methods**

| Study ID           | PCR method             | Volume used for PCR | Cell wall disruption method | DNA extraction method | Cycle number | Primer gene                | Primer sequence                                                                                      | Internal inhibition control | Contamination control | Aspergillus spp. detected by primer             |
|--------------------|------------------------|---------------------|-----------------------------|-----------------------|--------------|----------------------------|------------------------------------------------------------------------------------------------------|-----------------------------|-----------------------|-------------------------------------------------|
| Bretagne 1995 (6)  | Standard               | 1.5 cc              | Beads beating               | Phenol-chloroform     | 40           | Mitochondrial DNA fragment | 5' GAA AGG TCA GGT GTT CGA GTC AC 3' (804 to 826)/ 5' CTT TGG TTG CGG GTT TAG GGA TT 3' (914 to 938) | Y                           | Y                     | A. fumigatus, A. flavus, A. terreus, A. niger   |
| Buchheidt 2001 (7) | Nested                 | 1.5 cc              | Lyticase                    | Phenol-chloroform     | 23+35        | 18S rRNA                   | 5' CGG CCC TTA AAT AGC CCG 3' (1296–1313)/ 5' GA CCG GGT TTG ACC AAC TTT 3' (1681–1700)              | Y                           | Y                     | Various A. spp.                                 |
| Frealle 2009 (15)  | Real-time, LightCycler | NS                  | Lyticase                    | QIAGEN                | 55           | 18S rRNA                   | 5'-CTGTTAGTGCGGGAGTTCAAAXTCT-3' / 5'-CTGAGCTAATTTCTTTCAACCCA                                         | Y                           | Y                     | A. fumigatus , A. flavus , A. niger, A. terreus |

|                      |                                    |        |          |                       |       |                           |                                                                                     |   |    |                                                                                                                            |
|----------------------|------------------------------------|--------|----------|-----------------------|-------|---------------------------|-------------------------------------------------------------------------------------|---|----|----------------------------------------------------------------------------------------------------------------------------|
|                      |                                    |        |          |                       |       |                           | AGGGA-3'                                                                            |   |    |                                                                                                                            |
| Hadrich 2011<br>(19) | Real-time,<br>TaqMan,<br>PCR-ELISA | NS     | NS       | QIAgen                | 45    | 18S rRNA                  | 5' -AAG CTC GTA GTT GAA CCT<br>TG-3' / 5'-ATG GTC CTA GAA ACC<br>AAC AA-3' (45-294) | Y | NS | A. fumigatus ,<br>A. flavus, A.<br>terreus , A.<br>niger , A.<br>nidulans , A.<br>ustus , A.<br>glaucus , A.<br>versicolor |
| Hayette 2001<br>(20) | Nested                             | 1-5 cc | NS       | Phenol-<br>chloroform | 30+30 | Alkaline<br>protease gene | 5' AGCACCGACTACATCTAC 3' / 5'<br>GAGAT GGTGTTGGTGGC 3'                              | Y | NS | A. fumigatus ,<br>A. flavus, A.<br>terreus , A.<br>niger , A.<br>nidulans , A.<br>glaucus                                  |
| Jones 1998<br>(21)   | PCR-ELISA                          | 0.2 cc | Lyticase | Phenol-<br>chloroform | 40    | Mitochondrial<br>DNA      | 5'<br>GAAAGGTCAGGTGTTTCGAGTCA                                                       | Y | Y  | A. fumigatus ,<br>A. flavus , A.                                                                                           |

|                    |                      |        |                  |                          |    |          |                                                                                                                                                                                                                                                                               |   |   |                                                     |
|--------------------|----------------------|--------|------------------|--------------------------|----|----------|-------------------------------------------------------------------------------------------------------------------------------------------------------------------------------------------------------------------------------------------------------------------------------|---|---|-----------------------------------------------------|
|                    |                      |        |                  |                          |    | fragment | 3' (804-826) / 5'<br>CTTGGTTGCGGGTTTAGGGATT 3'<br>(916-938)                                                                                                                                                                                                                   |   |   | niger                                               |
| Khot 2008<br>(22)  | Real-time,<br>TaqMan | 2-5 cc | Beads<br>beating | Master Pure<br>Yeast kit | 45 | 18S rRNA | 5' GAT AAC GAA CGA GAC CTC<br>GG 3' / 5' AGA CCT GTT ATT GCC<br>GCG C 3'                                                                                                                                                                                                      | Y | Y | Various A.<br>spp.                                  |
| Luong 2011<br>(24) | Real-time            | 0.5 cc | NS               | QIAgen                   | NS | 18S rRNA | pan A. 5'<br>GTGGAGTGATTTGTCTGCTTAAT<br>TG 3' (1215–1239) / 5'<br>TCTAAGGGCATCACAGACCTGTT<br>3' (1345–1367) A. fumigatus 5'<br>GCCCGCCGTTTCGAC 3' (86-100) /<br>5'<br>CCGTTGTTGAAAGTTTTAACTGA<br>TTAC 3' (195-221) A. terreus 5'<br>CATTACCGAGTGCGGGTCTTTA 3'<br>(12-33) / 5' | Y | Y | pan-<br>Aspergillus,<br>A. fumigatus,<br>A. terreus |

|                                    |                           |         |                  |                               |    |                                                                |                                                                                                                                                     |   |   |                                                        |
|------------------------------------|---------------------------|---------|------------------|-------------------------------|----|----------------------------------------------------------------|-----------------------------------------------------------------------------------------------------------------------------------------------------|---|---|--------------------------------------------------------|
|                                    |                           |         |                  |                               |    |                                                                | CCCGCCGAAGCAACAAG 3' (65-81)                                                                                                                        |   |   |                                                        |
| Musher 2004<br>(27)                | Real-time                 | 1-5 cc  | NS               | Master Pure<br>Yeast kit      | 45 | 18S rRNA                                                       | 5' GATACCGTYGTAGTCTTA 3' / 5'<br>TG TCTGGACCTGGTGAGT 3'                                                                                             | Y | Y | Various A.<br>spp.                                     |
| Orsi 2012<br>(28)                  | Real-time                 | 1-2 cc  | Beads<br>beating | MycXtra™                      | 36 | 18S rRNA                                                       | 5' GAT AAC GAA CGA GAC CTC<br>GG 3' / 5' AGA CCT GTT ATT GCC<br>GCG C 3'                                                                            | Y | Y | Various A.<br>spp.                                     |
| Raad 2002<br>(29)                  | Standard                  | 1 cc    | NS               | Phenol-<br>chloroform         | 40 | Mitochondrial<br>DNA<br>fragment,<br>Alkaline<br>protease gene | ALP 5' AGCACCGACTACATCTAC<br>3' / 5' GAGATGGTGTGGTGGC 3'<br>mitochondrial 5'<br>GAAAGGTCAGGTGTTCGAGTCAC<br>3' / 5'<br>CTTTGGTTGCGGGTTTAGGGATT<br>3' | Y | Y | A. fumigatus,<br>A. flavus, A.<br>terreus, A.<br>niger |
| Rantakokko-<br>Jalava 2003<br>(30) | Real-time,<br>LightCycler | 5-10 cc | Lyticase         | QIAGEN ,<br>DNA-Pure<br>yeast | 45 | Mitochondrial<br>DNA<br>fragment                               | 5' GAA AGG TCA GGT GTT CGA<br>GTC A 3' / 5' CTT GGT TGC GGG<br>TTT AGG GAT T 3'                                                                     | Y | Y | A. fumigatus,<br>A. flavus, A.<br>terreus, A.          |

|                          |                                                          |        |          |                                                                                                 |       |          |                                                                            |    |    |                                                            |
|--------------------------|----------------------------------------------------------|--------|----------|-------------------------------------------------------------------------------------------------|-------|----------|----------------------------------------------------------------------------|----|----|------------------------------------------------------------|
|                          |                                                          |        |          | genomic kit,<br>High Pure<br>PCR<br>template<br>preparation<br>kit, Master<br>Pure Yeast<br>kit |       |          |                                                                            |    |    | niger                                                      |
| Reinwald<br>2012 (31)    | Nested                                                   | 1.5 cc | Lyticase | Phenol-<br>chloroform                                                                           | 58    | 18S rRNA | AFU7S CGG CCC TTA AAT AGC<br>CCG AFU7AS GA CCG GGT TTG<br>ACC AAC TTT      | Y  | Y  | Various A.<br>spp                                          |
| Roselló 2011<br>(32)     | Real-time,<br>SmartCycler                                | 0.4 cc | NS       | QIAgen                                                                                          | NS    | 18S rRNA | NS                                                                         | NS | NS | Various A.<br>spp                                          |
| Sanguinetti<br>2003 (33) | Real-time,<br>iCyclerIq,<br>Nested (used<br>in analysis) | 1.5 cc | NS       | QIAgen                                                                                          | 40+30 | 18S rRNA | 5' CCG ATT ACG TCC CTG CCC TT<br>3' / 5' TTG ACC AAC TTT CCG GCT<br>CTG 3' | NS | Y  | A. fumigatus,<br>A. flavus, A.<br>glaucus, A.<br>niger, A. |



|                      |                                                      |         |                  |                       |    |                                  |                                                                                   |    |    |                                                                                               |
|----------------------|------------------------------------------------------|---------|------------------|-----------------------|----|----------------------------------|-----------------------------------------------------------------------------------|----|----|-----------------------------------------------------------------------------------------------|
|                      |                                                      |         |                  |                       |    |                                  |                                                                                   |    |    | terreus                                                                                       |
| Shahid 2008<br>(34)  | Standard                                             | 0.1 cc  | NS               | Phenol-<br>chloroform | 35 | Mitochondrial<br>DNA<br>fragment | 5' GAA AGG TCA GGT GTT CGA<br>GTC AC 3' / 5' CTT TGG TTG CGG<br>GTT TAG GGA TT 3' | Y  | Y  | A. fumigatus,<br>A. flavus, A.<br>niger                                                       |
| Tang 1993<br>(39)    | Standard                                             | 0.25 cc | Beads<br>beating | Phenol-<br>chloroform | 42 | Alkaline<br>protease gene        | 5'AGCACCGACTACATCTAC3' / 5'<br>GAGAT GGTGTTGGTGGC 3'                              | NS | Y  | A. fumigatus,<br>A.flavus                                                                     |
| Torelli 2011<br>(41) | Real-time,<br>SmartCycler,<br>Real-time in-<br>house | 5 cc    | Beads<br>beating | MycXtra               | 36 | 18S rRNA                         | 5' GAT AAC GAA CGA GAC CTC<br>GG 3' / 5' AGA CCT GTT ATT GCC<br>GCG C 3'          | Y  | Y  | Various A.<br>spp. And<br>specially A.<br>fumigatus, A.<br>flavus, A.<br>terreus, A.<br>niger |
| Verweij 1995<br>(43) | Standard                                             | 5-10 cc | Beads<br>beating | Phenol-<br>chloroform | 30 | 18S rRNA                         | 5' CCTGGT TGATCCTGCCAGTA 3'<br>/ 5' GCTTGATCCTTCTGCA GGTT 3'                      | NS | NS | Various A.<br>spp                                                                             |

PCR – polymerase chain reaction, ELISA - Enzyme-Linked Immunosorbent Assay, Y – yes, NS – not stated

**Supplementary Figure 1:** HSROC for PCR in the diagnosis of proven or probable IPA.

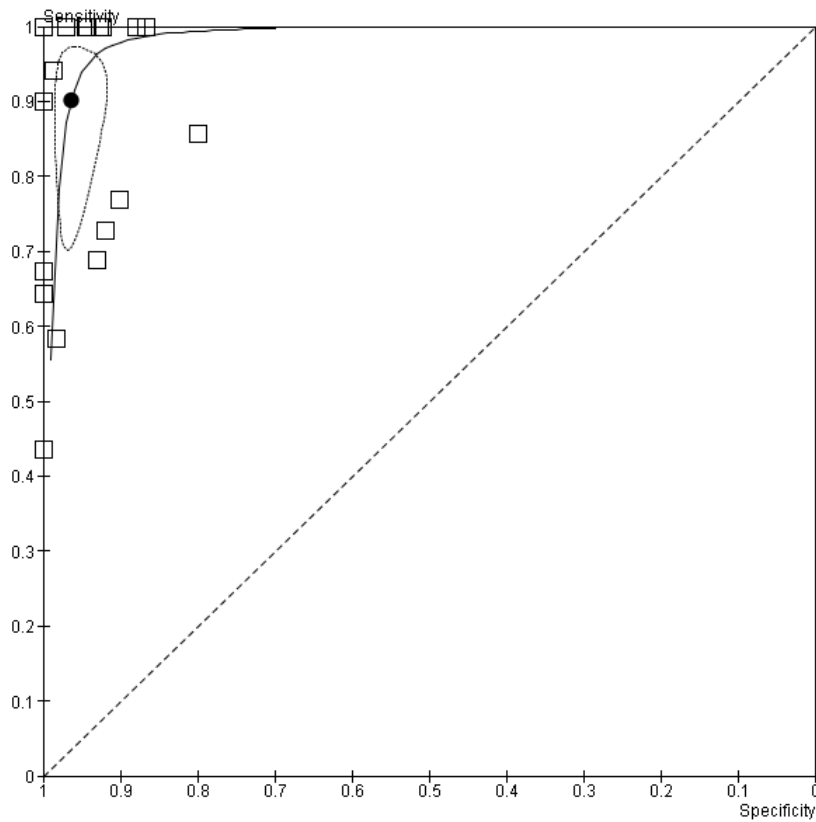

Studies points are scaled by the inverse of their standard errors. The summary point with 95% confidence region is shown: sensitivity 90.2% (95% CI 77.2-96.1%), specificity 96.4% (95% CI 93.3-98.1%).
