# Supplementary material
Source: PubMed Central journal article supplement (PMC3486225)
Supplement: JCM.00942-12_zjm999092057so2.pdf [file JCM.00942-12_zjm999092057so2.pdf]

Diagnostic accuracy of PCR alone and compared to galactomannan in bronchoalveolar lavage for the diagnosis of invasive aspergillosis: Systematic review

Supplemental material:

**Supplementary Table 1:** QUADAS-2 tool adapted for our review

|                                                       |                                                                                                                                                                                                                                                             |
|-------------------------------------------------------|-------------------------------------------------------------------------------------------------------------------------------------------------------------------------------------------------------------------------------------------------------------|
| Patient selection – Risk of bias                      | <p>1. Was a consecutive or random sample of patients enrolled?</p> <p>2. Was a case-control design avoided?</p> <p>3. Did the study avoid inappropriate exclusions?</p> <p>If case control = high risk, if all yes = low risk.</p> <p>Otherwise unclear</p> |
| Patient selection – Concerns regarding applicability  | <p>Is there concern that the included patients do not match the review question?</p> <p>Considered high = not strictly adherent with EORTC/MSG host criteria, low = host + clinical factor by EORTC/MSG. Otherwise unclear.</p>                             |
| Index test – Risk of bias                             | <p>Were the index test results interpreted without knowledge of the results of the reference standard?</p> <p>If no = high risk, if yes = low risk. Otherwise unclear</p>                                                                                   |
| Reference standard – Risk of bias                     | <p>Were the reference standard results interpreted without knowledge of the results of the index test?</p> <p>If no = high risk, if yes = low risk. Otherwise unclear</p>                                                                                   |
| Reference standard – Concerns regarding applicability | <p>Is there concern that the target condition as defined by the reference standard does not match the review question?</p> <p>Considered high = reference standard not strictly</p>                                                                         |

|                                |                                                                                                                                                                                                                                                                                                                                                                                                                                           |
|--------------------------------|-------------------------------------------------------------------------------------------------------------------------------------------------------------------------------------------------------------------------------------------------------------------------------------------------------------------------------------------------------------------------------------------------------------------------------------------|
|                                | <p>adherent with EORTC criteria 2002 or 2008, low = reference standard EORTC criteria 2002 or 2008 or these could be reapplied using individual patient description.</p> <p>Otherwise unclear.</p>                                                                                                                                                                                                                                        |
| Flow and timing - Risk of bias | <p>1. Was there an appropriate interval between index test(s) and reference standard?</p> <p>2. Did all patients receive a reference standard?</p> <p>3. Did patients receive the same reference standard?</p> <p>4. Were all patients included in the analysis?</p> <p>If any no = high risk, if all yes = low risk. Otherwise unclear</p> <p>Q1 considered appropriate interval if BAL performed within 2 weeks of infection onset.</p> |

The following signaling questions were considered irrelevant for our review:

| <b>Domain</b>                                 | <b>Signalling question</b>                                                           | <b>Reason for exclusion</b>                                                                                                                            |
|-----------------------------------------------|--------------------------------------------------------------------------------------|--------------------------------------------------------------------------------------------------------------------------------------------------------|
| Index test – Risk of bias                     | If a threshold was used, was it pre-specified?                                       | Results of PCR are read as positive or negative. Real-time PCR might have a threshold of copies, however again, result is read as positive or negative |
| Index test – Concerns regarding applicability | Is there concern that the index test, its conduct, or interpretation differ from the | Per inclusion criteria only PCR tests were included and all PCR tests were                                                                             |

|                                      |                                                                              |                                                                                                        |
|--------------------------------------|------------------------------------------------------------------------------|--------------------------------------------------------------------------------------------------------|
|                                      | review question?                                                             | considered in our review                                                                               |
| Reference standard –<br>Risk of bias | Is the reference standard likely to correctly classify the target condition? | EORTC/ MSG clinical criteria considered as adequate reference standard, even though it has limitations |
| Flow and timing -<br>Risk of bias    |                                                                              | The answer in all studies was yes, therefore this question was excluded                                |

**Supplementary Table 2: Excluded trials and reason for exclusion**

No reference standard or EORTC/MSG definitions inappropriately applied and data in publication did not permit re-application of consensus definitions (E18, E21, E23, E29, E34)

Used previously known *Aspergillus*-positive samples (E26, E31)

No BAL performed or no cases of IA (E27-28, E36, E38)

Population assessed not at risk for IA (E1, E7, E9, E39) or data for patients at risk could not be separated from patients not at risk (E30)

Bronchoscopy used for screening (E2, E6)

Case series / case reports (E14, E35)

Non-relevant (E10)

Incomplete data reported to construct 2X2 tables for sensitivity and specificity (E3-4, E8, E11-13, E15-17, E19-20, E22, E32-33, E37, E40)

Inclusion of same patients as Buchheidt 2001 included in the review (E5) and Reinwald 2012 (E24-25). The publications with more patients or full subgroup analyses were selected for inclusion.

**Supplementary Table 3: Study characteristics**

| Study ID              | City,<br>Country     | Year<br>start | Year<br>end | Study design                 | N<br>patients | N (%)<br>Haematological<br>malignancy/ N<br>(%) HSCT | Study population                                                                                                                                                                                                                         | Criteria used for IPA<br>definition (adherence<br>to the reference<br>standard Y / N) | N patients<br>with proven /<br>probable |
|-----------------------|----------------------|---------------|-------------|------------------------------|---------------|------------------------------------------------------|------------------------------------------------------------------------------------------------------------------------------------------------------------------------------------------------------------------------------------------|---------------------------------------------------------------------------------------|-----------------------------------------|
| Bretagne<br>1995(6)   | Cre`teil,<br>France  | 1992          | 1993        | Cohort,<br>prospective       | 28            | 11 (39.3%) / 9<br>(32.1%)                            | Immunocompromised patients with<br>respiratory signs and unexplained fever                                                                                                                                                               | NIAID-MSG 1989<br>(N)                                                                 | 3 (10.7%)                               |
| Buchheidt<br>2001 (7) | Mannheim,<br>Germany | 1995          | 1998        | Cohort,<br>prospective       | 67            | 61 (89.5%) / 4<br>(6.0%)                             | Patients with haematological malignancies,<br>neutropenia , fever unresponsiveness to the<br>first line antibacterial treatment, and/or<br>newly arisen nonspecific pulmonary<br>infiltrates proven by conventional chest<br>radiography | NIAID-MSG 1989<br>(Y)                                                                 | 9 (13.4%)                               |
| Frealle 2009<br>(15)  | Lille,<br>France     | 2000          | 2004        | Cohort,<br>retrospective     | 55            | 55 (100.0%) / 3<br>(5.5%)                            | Haematological cancer patients, HSCT at<br>risk for IA                                                                                                                                                                                   | EORTC\MSG 2002<br>(Y)                                                                 | 23 (41.8%)                              |
| Hadrich<br>2011 (19)  | Sfax,<br>Tunisia     | 2004          | 2007        | Case-Control,<br>prospective | 42            | 42 (100%) / 0<br>(0.0%)                              | Haematological cancer patients with febrile<br>neutropenia and persistent fever for more                                                                                                                                                 | EORTC\MSG 2008<br>modified (N)                                                        | 14 (33.3%)                              |

|                      |                       |      |      |                                |     |                             |                                                                                                  |                                                     |            |
|----------------------|-----------------------|------|------|--------------------------------|-----|-----------------------------|--------------------------------------------------------------------------------------------------|-----------------------------------------------------|------------|
|                      |                       |      |      |                                |     |                             | than 96 h refractory to broad-spectrum antibacterial treatments on whom BALs were performed      |                                                     |            |
| Hayette<br>2001 (20) | Lie`ge,<br>Belgium    | 1997 | 1998 | Cohort,<br>prospective         | 74  | 16 (21.6%) / 0<br>(0.0%)    | Haematological malignancies, HSCT, SOT, high dose steroids. All patients undergoing bronchoscopy | NIAID-MSG 1989<br>modified (N)                      | 10 (13.5%) |
| Jones 1998<br>(21)   | Manchester,<br>UK     | NS   | NS   | Cohort,<br>prospective         | 69  | 69 (100.0%) /<br>NS         | Haematological cancer patients with febrile episodes unresponsive to antibiotics                 | Authors defined.<br>Based on NIAID-<br>MSG 1989 (N) | 5 (7.2%)   |
| Khot 2008<br>(22)    | Seattle,<br>WA, US    | 2002 | 2003 | Cohort,<br>retrospective       | 94  | 94 (100.0%) / 8<br>(61.5%)  | Patients with haematological malignancies or undergoing HSCT with pneumonia or pulmonary nodules | EORTC\MSG 2002<br>(Y)                               | 13 (13.8%) |
| Luong 2011<br>(24)   | Pittsburgh,<br>PA, US | 2000 | 2010 | Cohort,<br>retrospective       | 150 | 0 (0.0%) / 0<br>(0.0%)      | Lung transplant recipients who underwent bronchoscopy for surveillance or diagnostic evaluation  | EORTC\MSG 2008<br>modified (N)                      | 16 (10.6%) |
| Musher<br>2004 (27)  | Seattle,<br>WA, US    | 1993 | 2002 | Case-Control,<br>retrospective | 93  | 93 (100.0%) /<br>44 (88.0%) | Haematological malignancies, bronchoscopy to evaluate pulmonary nodules or infiltrates           | EORTC\MSG 2002<br>modified (N)                      | 46 (49.4%) |

|                                    |                      |      |      |                                |     |                             |                                                                                                                     |                                |            |
|------------------------------------|----------------------|------|------|--------------------------------|-----|-----------------------------|---------------------------------------------------------------------------------------------------------------------|--------------------------------|------------|
|                                    |                      |      |      |                                |     |                             | that were detected after or while being evaluated for HSCT                                                          |                                |            |
| Orsi 2012<br>(28)                  | Modena,<br>Italy     | NS   | NS   | Case-Control,<br>retrospective | 19  | 8 (42.1%) / NS              | Critically ill immunocompromised patients undergoing BAL for evaluation of pulmonary infiltrates                    | EORTC\MSG 2008<br>(Y)          | 6 (31.6%)  |
| Raad 2002<br>(29)                  | Houston,<br>TX, US   | 1996 | 1997 | Cohort,<br>prospective         | 249 | 165 (66.3%) /<br>NS         | Haematological malignancies, other cancer with chest radiographic findings suggestive of pneumonia                  | EORTC\MSG 2002<br>modified (Y) | 32 (12.8%) |
| Rantakokko<br>-Jalava 2003<br>(30) | Turku,<br>Finland    | NS   | NS   | Cohort,<br>prospective         | 66  | NS / NS                     | Haematological malignancies, HSCT, SOT, high dose steroids, bronchiectasis at risk for IA                           | EORTC\MSG 2002<br>(Y)          | 11 (16.6%) |
| Reinwald<br>2012 (31)              | Mannheim,<br>Germany | 2000 | 2011 | Cohort,<br>retrospective       | 226 | 214 (94.7%) /<br>53 (23.5%) | haematological patients at high risk for fungal infections with new lung infiltrates detected by high-resolution CT | EORTC\MSG2002<br>(Y)           | 48 (21.2%) |
| Roselló<br>2011 (32)               | Barcelona,<br>Spain  | NS   | NS   | Cohort,<br>prospective         | 42  | 9 (21.4%) / NS              | Haematological malignancies, SOT immunodeficiency with risk factors for IA                                          | EORTC\MSG 2008<br>(Y)          | 7 (16.6%)  |
| Sanguinetti                        | Rome, Italy          | 2001 | 2002 | Cohort,                        | 44  | 44 (100.0%) /               | Patients with haematological malignancies                                                                           | EORTC\MSG 2002                 | 20 (45.4%) |

|                      |                                 |      |      |                        |     |                            |                                                                                                                                                                                                                                      |                                                     |            |
|----------------------|---------------------------------|------|------|------------------------|-----|----------------------------|--------------------------------------------------------------------------------------------------------------------------------------------------------------------------------------------------------------------------------------|-----------------------------------------------------|------------|
| 2003 (33)            |                                 |      |      | prospective            |     | NS                         | and lung infiltrates                                                                                                                                                                                                                 | (Y)                                                 |            |
| Shahid 2008<br>(34)  | Aligarh,<br>India               | 2004 | 2006 | Cohort,<br>prospective | 69  | 0 (0.0%) / 0<br>(0.0%)     | Patients with lung carcinoma, receiving chemotherapy or chronic steroid therapy                                                                                                                                                      | EORTC\MSG 2002<br>modified (N)                      | 23 (33.3%) |
| Tang 1993<br>(39)    | London,<br>UK                   | NS   | NS   | Cohort,<br>prospective | 23  | 14 (60.9%) / 14<br>(60.9%) | Haematological malignancy, HSCT, SOT and clinical or radiological evidence of respiratory disease                                                                                                                                    | Authors defined.<br>Based on NIAID-<br>MSG 1989 (N) | 5 (21.7%)  |
| Torelli 2011<br>(41) | Rome, Italy                     | 2010 | 2011 | Cohort,<br>prospective | 158 | 52 (42.6%) /<br>NS         | Haematological malignancies, COPD, cirrhosis, cancer receiving chemotherapy, solid organ transplant recipient, HIV, steroid use, or recipient of T-cell immunosuppressant with pneumonia, fever, suspected invasive fungal infection | EORTC\MSG 2008<br>modified (N)                      | 17 (10.7%) |
| Verweij<br>1995 (43) | Nijmegen,<br>The<br>Netherlands | NS   | NS   | Cohort,<br>prospective | 19  | 17 (89.5%) / 5<br>(26.3%)  | Neutropenic patients with fever persisting despite treatment with broad-spectrum antibacterial agents and pulmonary infiltrates                                                                                                      | Authors defined.<br>Based on NIAID-<br>MSG 1989 (Y) | 9 (47.3%)  |



NR – not required, NS – not stated, HSCT – hematologic stem cell transplant, SOT – solid organ transplant, COPD- chronic obstructive pulmonary disease, HIV – human immunodeficiency virus, ICU – intensive care unit, NIAID-MSG – National institute of allergy and infectious diseases – mycoses study group. EORTC\MSG - European Organisation for Research and Treatment of Cancer – Mycoses Study Group.

**Supplementary Table 4: QUADAS-2 risk of bias assessment**

| <b>Study ID</b>    | <b>Patient selection – Risk of bias</b> | <b>Patient selection – Concerns regarding applicability</b> | <b>Index test – Risk of bias</b> | <b>Reference standard – Risk of bias</b> | <b>Reference standard – Concerns regarding applicability</b> | <b>Flow and timing - Risk of bias</b> |
|--------------------|-----------------------------------------|-------------------------------------------------------------|----------------------------------|------------------------------------------|--------------------------------------------------------------|---------------------------------------|
| Bretagne 1995 (6)  | H                                       | L                                                           | L                                | U                                        | U                                                            | U                                     |
| Buchheidt 2001 (7) | L                                       | L                                                           | L                                | L                                        | L                                                            | L                                     |
| Frealle 2009 (15)  | L                                       | L                                                           | L                                | L                                        | L                                                            | L                                     |
| Hadrich 2011 (19)  | H                                       | U                                                           | L                                | U                                        | H                                                            | U                                     |
| Hayette 2001 (20)  | H                                       | L                                                           | H                                | L                                        | H                                                            | U                                     |
| Jones 1998 (21)    | H                                       | U                                                           | L                                | H                                        | U                                                            | U                                     |
| Khot 2008 (22)     | L                                       | U                                                           | L                                | U                                        | L                                                            | U                                     |
| Luong 2011 (24)    | H                                       | L                                                           | L                                | U                                        | H                                                            | U                                     |
| Musher 2004 (27)   | H                                       | L                                                           | L                                | U                                        | H                                                            | H                                     |
| Orsi 2012 (28)     | H                                       | L                                                           | U                                | U                                        | U                                                            | L                                     |
| Raad 2002 (29)     | L                                       | L                                                           | L                                | U                                        | L                                                            | U                                     |

|                             |   |   |   |   |   |   |
|-----------------------------|---|---|---|---|---|---|
| Rantakokko-Jalava 2003 (30) | L | U | H | U | L | U |
| Reinwald 2012 (31)          | L | U | U | L | L | L |
| Roselló 2011 (32)           | L | U | H | U | U | U |
| Sanguinetti 2003 (33)       | L | U | L | L | L | L |
| Shahid 2008 (34)            | H | U | L | L | H | L |
| Tang 1993 (39)              | L | L | L | U | U | U |
| Torelli 2011 (41)           | L | H | L | L | H | L |
| Verweij 1995 (43)           | H | U | L | L | L | U |

H – high risk, U – unclear, L – low risk

**Supplementary Table 5: PCR methods**

| Study ID           | PCR method             | Volume used for PCR | Cell wall disruption method | DNA extraction method | Cycle number | Primer gene                | Primer sequence                                                                                      | Internal inhibition control | Contamination control | Aspergillus spp. detected by primer             |
|--------------------|------------------------|---------------------|-----------------------------|-----------------------|--------------|----------------------------|------------------------------------------------------------------------------------------------------|-----------------------------|-----------------------|-------------------------------------------------|
| Bretagne 1995 (6)  | Standard               | 1.5 cc              | Beads beating               | Phenol-chloroform     | 40           | Mitochondrial DNA fragment | 5' GAA AGG TCA GGT GTT CGA GTC AC 3' (804 to 826)/ 5' CTT TGG TTG CGG GTT TAG GGA TT 3' (914 to 938) | Y                           | Y                     | A. fumigatus, A. flavus, A. terreus, A. niger   |
| Buchheidt 2001 (7) | Nested                 | 1.5 cc              | Lyticase                    | Phenol-chloroform     | 23+35        | 18S rRNA                   | 5' CGG CCC TTA AAT AGC CCG 3' (1296–1313)/ 5' GA CCG GGT TTG ACC AAC TTT 3' (1681–1700)              | Y                           | Y                     | Various A. spp.                                 |
| Frealle 2009 (15)  | Real-time, LightCycler | NS                  | Lyticase                    | QIAGEN                | 55           | 18S rRNA                   | 5'-CTGTTAGTGCGGGAGTTCAAAXTCT-3' / 5'-CTGAGCTAATTTCTTTCAACCCA                                         | Y                           | Y                     | A. fumigatus , A. flavus , A. niger, A. terreus |

|                      |                                    |        |          |                       |       |                           |                                                                                     |   |    |                                                                                                                            |
|----------------------|------------------------------------|--------|----------|-----------------------|-------|---------------------------|-------------------------------------------------------------------------------------|---|----|----------------------------------------------------------------------------------------------------------------------------|
|                      |                                    |        |          |                       |       |                           | AGGGA-3'                                                                            |   |    |                                                                                                                            |
| Hadrich 2011<br>(19) | Real-time,<br>TaqMan,<br>PCR-ELISA | NS     | NS       | QIAgen                | 45    | 18S rRNA                  | 5' -AAG CTC GTA GTT GAA CCT<br>TG-3' / 5'-ATG GTC CTA GAA ACC<br>AAC AA-3' (45-294) | Y | NS | A. fumigatus ,<br>A. flavus, A.<br>terreus , A.<br>niger , A.<br>nidulans , A.<br>ustus , A.<br>glaucus , A.<br>versicolor |
| Hayette 2001<br>(20) | Nested                             | 1-5 cc | NS       | Phenol-<br>chloroform | 30+30 | Alkaline<br>protease gene | 5' AGCACCGACTACATCTAC 3' / 5'<br>GAGAT GGTGTTGGTGGC 3'                              | Y | NS | A. fumigatus ,<br>A. flavus, A.<br>terreus , A.<br>niger , A.<br>nidulans , A.<br>glaucus                                  |
| Jones 1998<br>(21)   | PCR-ELISA                          | 0.2 cc | Lyticase | Phenol-<br>chloroform | 40    | Mitochondrial<br>DNA      | 5'<br>GAAAGGTCAGGTGTTTCGAGTCA                                                       | Y | Y  | A. fumigatus ,<br>A. flavus , A.                                                                                           |

|                    |                      |        |                  |                          |    |          |                                                                                                                                                                                                                                                                               |   |   |                                                     |
|--------------------|----------------------|--------|------------------|--------------------------|----|----------|-------------------------------------------------------------------------------------------------------------------------------------------------------------------------------------------------------------------------------------------------------------------------------|---|---|-----------------------------------------------------|
|                    |                      |        |                  |                          |    | fragment | 3' (804-826) / 5'<br>CTTGGTTGCGGGTTTAGGGATT 3'<br>(916-938)                                                                                                                                                                                                                   |   |   | niger                                               |
| Khot 2008<br>(22)  | Real-time,<br>TaqMan | 2-5 cc | Beads<br>beating | Master Pure<br>Yeast kit | 45 | 18S rRNA | 5' GAT AAC GAA CGA GAC CTC<br>GG 3' / 5' AGA CCT GTT ATT GCC<br>GCG C 3'                                                                                                                                                                                                      | Y | Y | Various A.<br>spp.                                  |
| Luong 2011<br>(24) | Real-time            | 0.5 cc | NS               | QIAgen                   | NS | 18S rRNA | pan A. 5'<br>GTGGAGTGATTTGTCTGCTTAAT<br>TG 3' (1215–1239) / 5'<br>TCTAAGGGCATCACAGACCTGTT<br>3' (1345–1367) A. fumigatus 5'<br>GCCCGCCGTTTCGAC 3' (86-100) /<br>5'<br>CCGTTGTTGAAAGTTTTAACTGA<br>TTAC 3' (195-221) A. terreus 5'<br>CATTACCGAGTGCGGGTCTTTA 3'<br>(12-33) / 5' | Y | Y | pan-<br>Aspergillus,<br>A. fumigatus,<br>A. terreus |

|                                    |                           |         |                  |                               |    |                                                                |                                                                                                                                                     |   |   |                                                        |
|------------------------------------|---------------------------|---------|------------------|-------------------------------|----|----------------------------------------------------------------|-----------------------------------------------------------------------------------------------------------------------------------------------------|---|---|--------------------------------------------------------|
|                                    |                           |         |                  |                               |    |                                                                | CCCGCCGAAGCAACAAG 3' (65-81)                                                                                                                        |   |   |                                                        |
| Musher 2004<br>(27)                | Real-time                 | 1-5 cc  | NS               | Master Pure<br>Yeast kit      | 45 | 18S rRNA                                                       | 5' GATACCGTYGTAGTCTTA 3' / 5'<br>TG TCTGGACCTGGTGAGT 3'                                                                                             | Y | Y | Various A.<br>spp.                                     |
| Orsi 2012<br>(28)                  | Real-time                 | 1-2 cc  | Beads<br>beating | MycXtra™                      | 36 | 18S rRNA                                                       | 5' GAT AAC GAA CGA GAC CTC<br>GG 3' / 5' AGA CCT GTT ATT GCC<br>GCG C 3'                                                                            | Y | Y | Various A.<br>spp.                                     |
| Raad 2002<br>(29)                  | Standard                  | 1 cc    | NS               | Phenol-<br>chloroform         | 40 | Mitochondrial<br>DNA<br>fragment,<br>Alkaline<br>protease gene | ALP 5' AGCACCGACTACATCTAC<br>3' / 5' GAGATGGTGTGGTGGC 3'<br>mitochondrial 5'<br>GAAAGGTCAGGTGTTCGAGTCAC<br>3' / 5'<br>CTTTGGTTGCGGGTTTAGGGATT<br>3' | Y | Y | A. fumigatus,<br>A. flavus, A.<br>terreus, A.<br>niger |
| Rantakokko-<br>Jalava 2003<br>(30) | Real-time,<br>LightCycler | 5-10 cc | Lyticase         | QIAGEN ,<br>DNA-Pure<br>yeast | 45 | Mitochondrial<br>DNA<br>fragment                               | 5' GAA AGG TCA GGT GTT CGA<br>GTC A 3' / 5' CTT GGT TGC GGG<br>TTT AGG GAT T 3'                                                                     | Y | Y | A. fumigatus,<br>A. flavus, A.<br>terreus, A.          |

|                          |                                                          |        |          |                                                                                                 |       |          |                                                                            |    |    |                                                            |
|--------------------------|----------------------------------------------------------|--------|----------|-------------------------------------------------------------------------------------------------|-------|----------|----------------------------------------------------------------------------|----|----|------------------------------------------------------------|
|                          |                                                          |        |          | genomic kit,<br>High Pure<br>PCR<br>template<br>preparation<br>kit, Master<br>Pure Yeast<br>kit |       |          |                                                                            |    |    | niger                                                      |
| Reinwald<br>2012 (31)    | Nested                                                   | 1.5 cc | Lyticase | Phenol-<br>chloroform                                                                           | 58    | 18S rRNA | AFU7S CGG CCC TTA AAT AGC<br>CCG AFU7AS GA CCG GGT TTG<br>ACC AAC TTT      | Y  | Y  | Various A.<br>spp                                          |
| Roselló 2011<br>(32)     | Real-time,<br>SmartCycler                                | 0.4 cc | NS       | QIAgen                                                                                          | NS    | 18S rRNA | NS                                                                         | NS | NS | Various A.<br>spp                                          |
| Sanguinetti<br>2003 (33) | Real-time,<br>iCyclerIq,<br>Nested (used<br>in analysis) | 1.5 cc | NS       | QIAgen                                                                                          | 40+30 | 18S rRNA | 5' CCG ATT ACG TCC CTG CCC TT<br>3' / 5' TTG ACC AAC TTT CCG GCT<br>CTG 3' | NS | Y  | A. fumigatus,<br>A. flavus, A.<br>glaucus, A.<br>niger, A. |



|                      |                                                      |         |                  |                       |    |                                  |                                                                                   |    |    |                                                                                               |
|----------------------|------------------------------------------------------|---------|------------------|-----------------------|----|----------------------------------|-----------------------------------------------------------------------------------|----|----|-----------------------------------------------------------------------------------------------|
|                      |                                                      |         |                  |                       |    |                                  |                                                                                   |    |    | terreus                                                                                       |
| Shahid 2008<br>(34)  | Standard                                             | 0.1 cc  | NS               | Phenol-<br>chloroform | 35 | Mitochondrial<br>DNA<br>fragment | 5' GAA AGG TCA GGT GTT CGA<br>GTC AC 3' / 5' CTT TGG TTG CGG<br>GTT TAG GGA TT 3' | Y  | Y  | A. fumigatus,<br>A. flavus, A.<br>niger                                                       |
| Tang 1993<br>(39)    | Standard                                             | 0.25 cc | Beads<br>beating | Phenol-<br>chloroform | 42 | Alkaline<br>protease gene        | 5'AGCACCGACTACATCTAC3' / 5'<br>GAGAT GGTGTTGGTGGC 3'                              | NS | Y  | A. fumigatus,<br>A.flavus                                                                     |
| Torelli 2011<br>(41) | Real-time,<br>SmartCycler,<br>Real-time in-<br>house | 5 cc    | Beads<br>beating | MycXtra               | 36 | 18S rRNA                         | 5' GAT AAC GAA CGA GAC CTC<br>GG 3' / 5' AGA CCT GTT ATT GCC<br>GCG C 3'          | Y  | Y  | Various A.<br>spp. And<br>specially A.<br>fumigatus, A.<br>flavus, A.<br>terreus, A.<br>niger |
| Verweij 1995<br>(43) | Standard                                             | 5-10 cc | Beads<br>beating | Phenol-<br>chloroform | 30 | 18S rRNA                         | 5' CCTGGT TGATCCTGCCAGTA 3'<br>/ 5' GCTTGATCCTTCTGCA GGTT 3'                      | NS | NS | Various A.<br>spp                                                                             |

PCR – polymerase chain reaction, ELISA - Enzyme-Linked Immunosorbent Assay, Y – yes, NS – not stated

**Supplementary Figure 1:** HSROC for PCR in the diagnosis of proven or probable IPA.

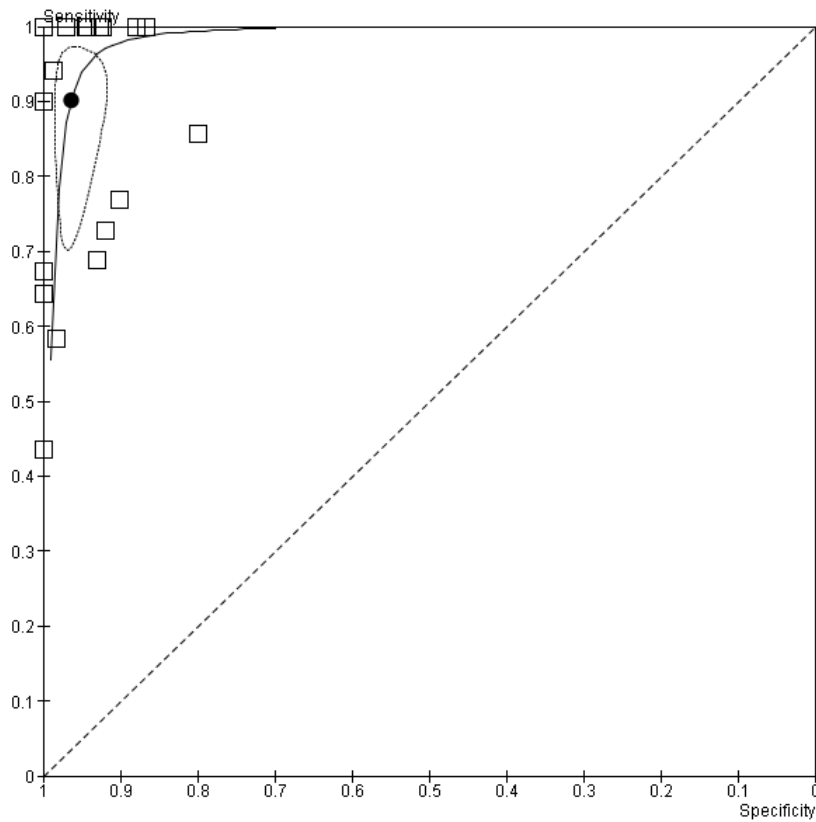

Studies points are scaled by the inverse of their standard errors. The summary point with 95% confidence region is shown: sensitivity 90.2% (95% CI 77.2-96.1%), specificity 96.4% (95% CI 93.3-98.1%).

## References for excluded studies

- E1. **Aquino VR, Nagel F, Andreolla HF, de-Paris F, Xavier MO, Goldani LZ, Denning DW, Pasqualotto AC.** The Performance of Real-Time PCR, Galactomannan, and Fungal Culture in the Diagnosis of Invasive Aspergillosis in Ventilated Patients with Chronic Obstructive Pulmonary Disease (COPD). *Mycopathologia*. 2012;
- E2. **Bart-Delabesse E, Marmorat-Khuong A, Costa JM, Dubreuil-Lemaire ML, Bretagne S.** Detection of *Aspergillus* DNA in bronchoalveolar lavage fluid of AIDS patients by the polymerase chain reaction. *Eur J Clin Microbiol Infect Dis*. 1997; **16**: 24-5.
- E3. **Bissinger AL, Einsele H, Hamprecht K, Schumacher U, Kandolf R, Loeffler J, Aepinus C, Bock T, Jahn G, Hebart H.** Infectious pulmonary complications after stem cell transplantation or chemotherapy: diagnostic yield of bronchoalveolar lavage. *Diagn Microbiol Infect Dis*. 2005; **52**: 275-80.
- E4. **Bolehovska R, Pliskova L, Buchta V, Cerman J, Hamal P.** Detection of *Aspergillus* spp. in biological samples by real-time PCR. *Biomed Pap Med Fac Univ Palacky Olomouc Czech Repub*. 2006; **150**: 245-8.
- E5. **Buchheidt D, Baust C, Skladny H, Baldus M, Brauninger S, Hehlmann R.** Clinical evaluation of a polymerase chain reaction assay to detect *Aspergillus* species in bronchoalveolar lavage samples of neutropenic patients. *Br J Haematol*. 2002; **116**: 803-11.
- E6. **Einsele H, Quabeck K, Muller KD, Hebart H, Rothenhofer I, Loeffler J, Schaefer UW.** Prediction of invasive pulmonary aspergillosis from colonisation of lower respiratory tract before marrow transplantation. *Lancet*. 1998; **352**: 1443.

- E7. **Fletcher HA, Barton RC, Verweij PE, Evans EG.** Detection of *Aspergillus fumigatus* PCR products by a microtitre plate based DNA hybridisation assay. *J Clin Pathol.* 1998; **51**: 617-20.
- E8. **Guinea J, Padilla C, Recio S, Escribano P, García de Viedma D, Peláez T, Muñoz P, Padilla B, Gijón P, Bouza E.** Clinical validation of a marketed real-time PCR assay for diagnosis of invasive aspergillosis in patients without haematological cancer. *European Congress of Clinical Microbiology and Infectious Diseases*; 2011.
- E9. **Halliday C, Wu QX, James G, Sorrell T.** Development of a nested qualitative real-time PCR assay to detect *Aspergillus* species DNA in clinical specimens. *J Clin Microbiol.* 2005; **43**: 5366-8.
- E10. **Hardak E, Yigla M, Avivi I, Fruchter O, Sprecher H, Oren I.** Impact of PCR-based diagnosis of invasive pulmonary aspergillosis on clinical outcome. *Bone Marrow Transplant.* 2009; **44**: 595-9.
- E11. **Hayette MP, Meex C, Boreux R, Huynen P, Melin P, De Mol P.** Evaluation of a new commercial real-time PCR for the detection of *Aspergillus* spp. in serum and respiratory samples. *European Congress of Clinical Microbiology and Infectious Diseases*; 2007.
- E12. **Hohenthal U, Itala M, Salonen J, Sipila J, Rantakokko-Jalava K, Meurman O, Nikoskelainen J, Vainionpaa R, Kotilainen P.** Bronchoalveolar lavage in immunocompromised patients with haematological malignancy--value of new microbiological methods. *Eur J Haematol.* 2005; **74**: 203-11.
- E13. **Hummel M, Spiess B, Roder J, von Komorowski G, Durken M, Kentouche K, Laws HJ, Morz H, Hehlmann R, Buchheidt D.** Detection of *Aspergillus* DNA by a nested PCR assay is able to improve the diagnosis of invasive aspergillosis in paediatric patients. *J Med Microbiol.* 2009; **58**: 1291-7.

- E14. **Kawazu M, Kanda Y, Goyama S, Takeshita M, Nannya Y, Niino M, Komeno Y, Nakamoto T, Kurokawa M, Tsujino S, Ogawa S, Aoki K, Chiba S, Motokura T, Ohishi N, Hirai H.** Rapid diagnosis of invasive pulmonary aspergillosis by quantitative polymerase chain reaction using bronchial lavage fluid. *Am J Hematol.* 2003; **72**: 27-30.
- E15. **Klingspor L, Jalal S.** Molecular detection and identification of *Candida* and *Aspergillus* spp. from clinical samples using real-time PCR. *Clin Microbiol Infect.* 2006; **12**: 745-53.
- E16. **Lass-Florl C, Bille J, Perlin D, Park S, Lagrou K, Harrison E, Meersseman W, Cui X, Hughes M, Denning DW, Maertens J.** Clinical performance of FXGTM : RESP (Asp +) assay for aspergillus on respiratory specimens. *European Congress of Clinical Microbiology and Infectious Diseases*; 2008.
- E17. **Lass-Florl C, Gunsilius E, Gastl G, Freund M, Dierich MP, Petzer A.** Clinical evaluation of *Aspergillus*-PCR for detection of invasive aspergillosis in immunosuppressed patients. *Mycoses.* 2005; **48 Suppl 1**: 12-7.
- E18. **Lengerova M, Hrnicrova K, Kocmanova I, Racil Z, Weinbergrova B, Vorlicek J, Mayer J.** Detection of *Aspergillus fumigatus* in Bronchoalveolar Lavage Samples from Immunocompromised Patients Using Real-time PCR with Fungal DNA Pre-amplification. *Interscience Conference on Antimicrobial Agents and Chemotherapy*; 2008.
- E19. **Loeffler J, Schultze N, Hebart H, Einsele H.** Detection of Genomic DNA from *Aspergillus* Species Using the LightCycler Technology. *Interscience Conference on Antimicrobial Agents and Chemotherapy*; 2005.

- E20. **Lopes da Silva R, Ribeiro P, Abreu N, Ferreira T, Fernandes T, Monteiro A, Costa F, Caldas J, Silva M, Carande L, Ferreira G, Conduto A, Cruz E, Sousa MH, Rodrigues AS, Costa I, Veiga J, de Sousa AB.** Early Diagnosis of Invasive Aspergillosis in Neutropenic Patients. Comparison between Serum Galactomannan and Polymerase Chain Reaction. *Clin Med Insights Oncol.* 2010; **4**: 81-8.
- E21. **Melchers WJ, Verweij PE, van den Hurk P, van Belkum A, De Pauw BE, Hoogkamp-Korstanje JA, Meis JF.** General primer-mediated PCR for detection of *Aspergillus* species. *J Clin Microbiol.* 1994; **32**: 1710-7.
- E22. **Meletiadis J, Melchers WJ, Meis JF, Van Den Hurk P, Jannes G, Verweij PE.** Evaluation of a polymerase chain reaction reverse hybridization line probe assay for the detection and identification of medically important fungi in bronchoalveolar lavage fluids. *Med Mycol.* 2003; **41**: 65-74.
- E23. **Nakamura H, Shibata Y, Kudo Y, Saito S, Kimura H, Tomoike H.**  
[Detection of *Aspergillus fumigatus* DNA by polymerase chain reaction in the clinical samples from individuals with pulmonary aspergillosis]. *Rinsho Byori.* 1994; **42**: 676-81.
- E24. **Reinwald M, Spiess B, Heinz W, Vehreschild J, Lass-Flörl C, Kiehl M, Schultheis B, Krause W, Wolf HH, Maschmeyer G, Hofmann WK, Buchheidt D.** Diagnosing Pulmonary Aspergillosis in Patients with Hematologic Malignancies: Prospective Evaluation of an *Aspergillus* PCR Assay and a Galactomannan ELISA in Bronchoalveolar Lavage Samples. *Interscience Conference on Antimicrobial Agents and Chemotherapy*; 2011.
- E25. **Reinwald M, Spiess B, Heinz WJ, Vehreschild JJ, Lass-Flörl C, Kiehl M, Schultheis B, Krause SW, Wolf HH, Bertz H, Maschmeyer G, Hofmann WK, Buchheidt D.** Diagnosing pulmonary aspergillosis in patients with hematological

malignancies: a multicenter prospective evaluation of an Aspergillus PCR assay and a galactomannan ELISA in bronchoalveolar lavage samples. *Eur J Haematol.* 2012;

E26. **Renaud N, Delhaes L, Coiteux V, Herwegh S, Yakoub-Agha I, Nseir S, Dei-Cas E, Frealle E.** Comparison of two Aspergillus real-time PCR methods and clinical significance of Aspergillus DNA detection in BAL. *European Congress of Clinical Microbiology and Infectious Diseases*; 2011.

E27. **Rickerts V, Just-Nubling G, Konrad F, Kern J, Lambrecht E, Bohme A, Jacobi V, Bialek R.** Diagnosis of invasive aspergillosis and mucormycosis in immunocompromised patients by seminested PCR assay of tissue samples. *Eur J Clin Microbiol Infect Dis.* 2006; **25**: 8-13.

E28. **Rickerts V, Mousset S, Lambrecht E, Tintelnot K, Schwerdtfeger R, Presterl E, Jacobi V, Just-Nubling G, Bialek R.** Comparison of histopathological analysis, culture, and polymerase chain reaction assays to detect invasive mold infections from biopsy specimens. *Clin Infect Dis.* 2007; **44**: 1078-83.

E29. **Schabereiter-Gurtner C, Selitsch B, Rotter ML, Hirschl AM, Willinger B.** Development of novel real-time PCR assays for detection and differentiation of eleven medically important Aspergillus and Candida species in clinical specimens. *J Clin Microbiol.* 2007; **45**: 906-14.

E30. **Skladny H, Buchheidt D, Baust C, Krieg-Schneider F, Seifarth W, Leib-Mosch C, Hehlmann R.** Specific detection of Aspergillus species in blood and bronchoalveolar lavage samples of immunocompromised patients by two-step PCR. *J Clin Microbiol.* 1999; **37**: 3865-71.

E31. **Spiess B, Buchheidt D, Baust C, Skladny H, Seifarth W, Zeilfelder U, Leib-Mosch C, Morz H, Hehlmann R.** Development of a LightCycler PCR assay

for detection and quantification of *Aspergillus fumigatus* DNA in clinical samples from neutropenic patients. *J Clin Microbiol.* 2003; **41**: 1811-8.

E32. **Spiess B, Seifarth W, Hummel M, Frank O, Fabarius A, Kovalevskaia E, Morz H, Hehlmann R, Buchheidt D.** Clinical Evaluation of a DNA Microarray for Detection and Identification of Fungal DNA in Blood, BAL and Tissue Samples of Neutropenic Patients. Interscience Conference on Antimicrobial Agents and Chemotherapy; 2007.

E33. **Spiess B, Seifarth W, Hummel M, Frank O, Fabarius A, Zheng C, Morz H, Hehlmann R, Buchheidt D.** DNA microarray-based detection and identification of fungal pathogens in clinical samples from neutropenic patients. *J Clin Microbiol.* 2007; **45**: 3743-53.

E34. **Spreadbury C, Holden D, Aufauvre-Brown A, Bainbridge B, Cohen J.** Detection of *Aspergillus fumigatus* by polymerase chain reaction. *J Clin Microbiol.* 1993; **31**: 615-21.

E35. **Steinmann J, Buer J, Rath PM, Paul A, Saner F.** Invasive aspergillosis in two liver transplant recipients: diagnosis by SeptiFast. *Transpl Infect Dis.* 2009; **11**: 175-8.

E36. **Susever S, Yegenoglu Y.** [Evaluation of the significance of molecular methods in the diagnosis of invasive fungal infections: comparison with conventional methods]. *Mikrobiyol Bul.* 2011; **45**: 325-35.

E37. **Torres M, Aller A, Ram'irez M, Castro C, Ruiz M, Cisneros J, Espigado I, Aznar J, Mart'in-Mazuelos E, Palomares J.** Detection and identification of *Aspergillus* spp. and *Candida* spp. by real-time PCR in clinical samples. European Congress of Clinical Microbiology and Infectious Diseases; 2007.



- E38. **Verjans GM, Brinkman BM, Van Doornik CE, Kijlstra A, Verweij CL.** Polymorphism of tumour necrosis factor-alpha (TNF-alpha) at position -308 in relation to ankylosing spondylitis. *Clin Exp Immunol.* 1994; **97**: 45-7.
- E39. **Wang LJ, Zhu M, Cao JJ, Gu HT, Lu XX.** [Performance of locked nucleic acid probe real-time polymerase chain reaction in the detection of *Aspergillus fumigatus*]. *Zhonghua Yi Xue Za Zhi.* 2011; **91**: 1268-71.
- E40. **Zhu XM, Zhou X.** [The value of real-time PCR analysis of serum samples for early diagnosis of invasive pulmonary aspergillosis in organ transplant recipients]. *Zhonghua Jie He He Hu Xi Za Zhi.* 2008; **31**: 678-81.
